# Supplementary material for: Hyaluronated nanohydroxyapatite responsively released from injectable hydrogels for targeted therapy of melanoma
Source: Royal Society of Chemistry journal article supplement (doi:10.1039/d4nr01696c), 2024-01-01
Supplement: d4nr01696c1.pdf [file d4nr01696c1.pdf]

## **Hyaluronated nanohydroxyapatite responsively released from injectable hydrogels for targeted therapy of melanoma**

Huiling Chen<sup>1,2,#</sup>, Mingda Zhao<sup>1,2,#</sup>, Jingyi Liu<sup>1,2</sup>, Ruiling Xu<sup>1,2</sup>, Yaping Zou<sup>1,2</sup>, Peilei Wang<sup>1,2</sup>, Lei Tong<sup>1,2</sup>, Yujiang Fan<sup>1,2</sup>, Xingdong Zhang<sup>1,2</sup>, Jie Liang<sup>1,3\*</sup>, Yong Sun<sup>1,2\*</sup>

<sup>1</sup> National Engineering Research Center for Biomaterials, Sichuan University, 29# Wangjiang Road, Chengdu, Sichuan, 610064, P. R. China

<sup>2</sup> College of Biomedical Engineering, Sichuan University, 29# Wangjiang Road, Chengdu, Sichuan, 610064, P. R. China

<sup>3</sup>Sichuan Testing Center for Biomaterials and Medical Devices, Sichuan University, 29# Wangjiang Road, Chengdu, 610064 China

# These authors contributed equally: Huiling Chen, Mingda Zhao.

**\*Corresponding author.**

Email: sunyong8702@scu.edu.cn (Y.S.), liangjie@scu.edu.cn (J.L.)

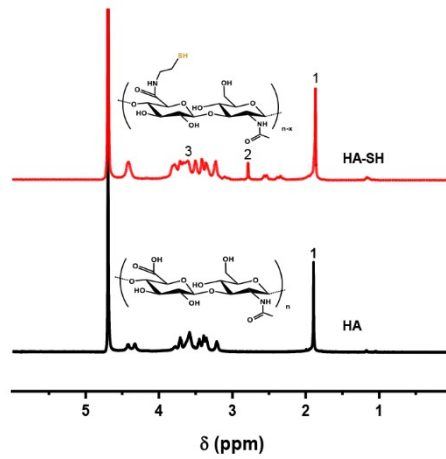

Supplementary Fig. 1. <sup>1</sup>H NMR image of HA and HA-SH.

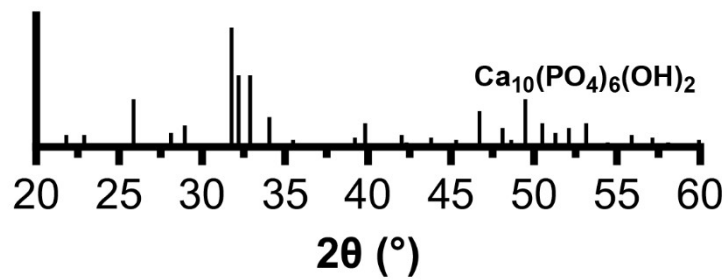

Supplementary Fig. 2. The XRD standard card of nHAp.

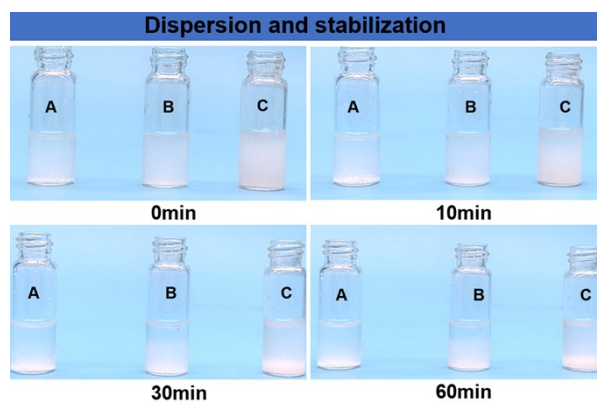

Supplementary Fig. 3. Distribution and stability of three types of nHAp in hydrogels during the formation of hydrogel, A: nHAp, B: non-thiolated HA modified nHAp, C: thiolate HA modified nHAp.

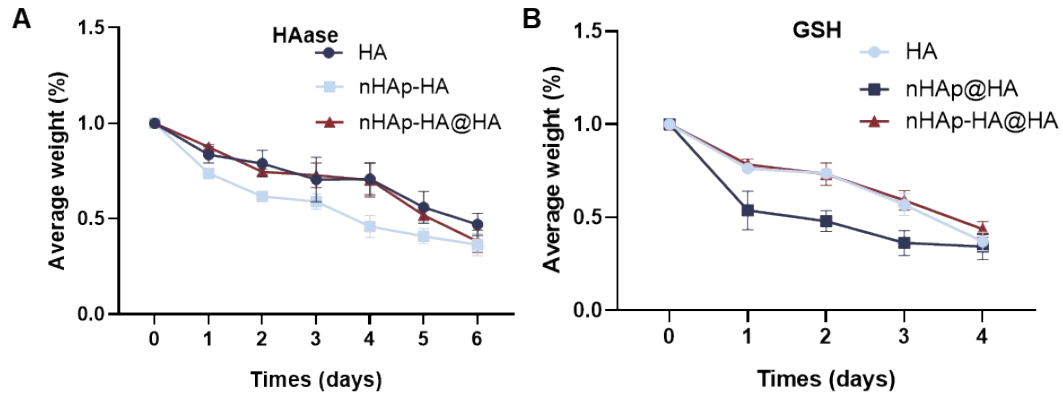

Supplementary Fig. 4. (A - B) The mass loss of gels (HA, nHAp@HA, nHAp-HA@HA) at different time points in media contain HAase or GSH ( $n = 3$ ), pH 7.4.

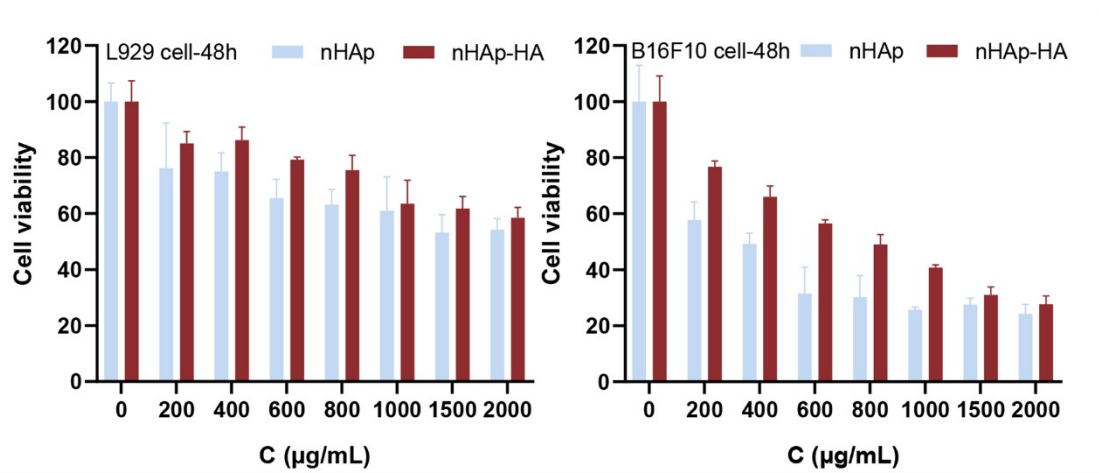

Supplementary Fig. 5. The Cytotoxicity contrast of nHAp and nHAp-HA.

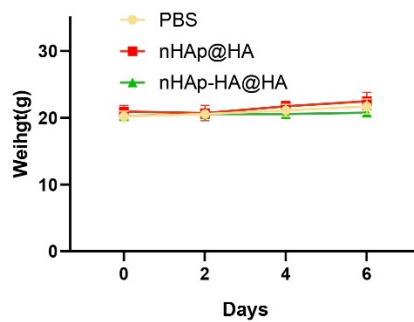

Supplementary Fig. 6. Body weight shift of normal mice after subcutaneously injected PBS and nHAp-HA@HA hydrogels within 6 days.

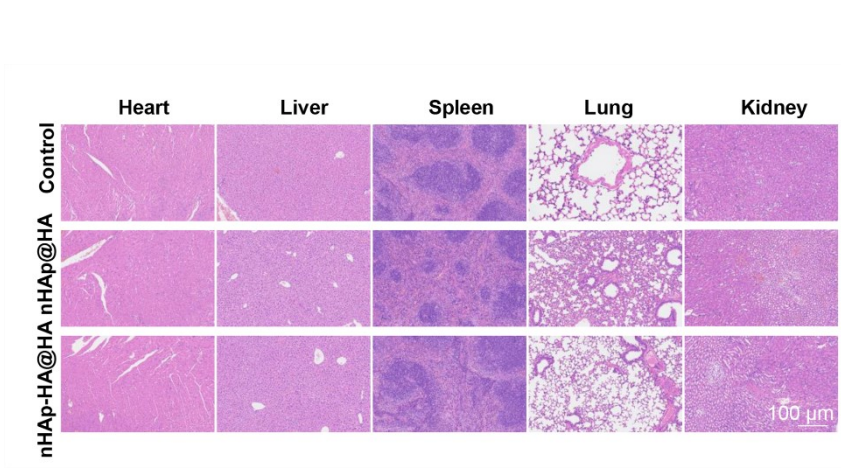

Supplementary Fig. 7. H&E staining of major organ sections after different dosage forms treatment against B16F10 tumor-bearing mice at day 6. Scale bar: 500 µm.
